# Supplementary material
Source: PubMed Central journal article supplement (PMC4898149)
Supplement: iijf_a_1161012_sm4890.pdf [file iijf_a_1161012_sm4890.pdf]

# SUPPLEMENTAL DATA

**Table S1. Total Fat and fatty acid composition of spreads and margarines in the US market in 2013, expressed in g per 100g edible food and % of total fatty acids\***

|    | Format | Type  | Branded | Total fat | Total SFA |      |      |      |      | Total MUFA |        |      | Total PUFA |        | C18:2 (LA) |      | C18:3 (ALA) | EPAY/DHA | Total TFA | Total TFA | PHVO |
|----|--------|-------|---------|-----------|-----------|------|------|------|------|------------|--------|------|------------|--------|------------|------|-------------|----------|-----------|-----------|------|
|    |        |       |         | g/100g    | g/100g    | % FA       | g/100g | % FA | % FA       | g/100g | % FA       | % FA | % FA        | % FA     | g/100g    | % FA      |      |
| 1  | Tub    | Light | B       | 40.8      | 10.5      | 26.9 | 2.9  | 1.1  | 16.6 | 4.8        | 9.1    | 23.3 | 23.0       | 19.3   | 49.6       | 43.4 | 5.9         | 0.0      | 0.1       | 0.2       | no   |
| 2  | Tub    | Light | B       | 39.0      | 10.3      | 27.6 | 2.8  | 1.2  | 17.4 | 4.8        | 8.8    | 23.6 | 23.3       | 18.1   | 48.6       | 42.5 | 5.8         | 0.0      | 0.1       | 0.2       | no   |
| 3  | Tub    | Light | B       | 46.9      | 16.4      | 36.8 | 1.6  | 5.4  | 17.0 | 6.5        | 21.5   | 48.2 | 45.7       | 5.8    | 13.0       | 11.1 | 1.7         | 0.1      | 0.9       | 2.0       | no   |
| 4  | Tub    | Light | B       | 38.7      | 7.7       | 20.8 | 0.0  | 0.4  | 16.7 | 2.8        | 20.6   | 55.6 | 54.2       | 8.7    | 23.4       | 17.3 | 5.7         | 0.0      | 0.1       | 0.2       | no   |
| 5  | Tub    | Light | B       | 36.4      | 7.3       | 21.0 | 1.5  | 0.9  | 13.3 | 4.3        | 11.3   | 32.5 | 31.6       | 16.1   | 46.3       | 39.2 | 6.8         | 0.0      | 0.1       | 0.2       | no   |
| 6  | Tub    | Light | B       | 37.6      | 9.0       | 25.1 | 0.2  | 0.7  | 21.5 | 3.2        | 18.3   | 51.2 | 50.4       | 8.1    | 22.7       | 18.4 | 4.9         | 0.4      | 0.4       | 1.1       | no   |
| 7  | Tub    | Light | B       | 40.4      | 12.2      | 31.7 | 0.2  | 0.6  | 25.2 | 4.9        | 12.6   | 32.7 | 32.3       | 13.6   | 35.2       | 29.8 | 5.3         | 0.0      | 0.2       | 0.4       | no   |
| 8  | Tub    | Reg   | B       | 57.7      | 5.6       | 10.1 | 0.0  | 0.0  | 5.4  | 4.1        | 32.5   | 58.9 | 55.7       | 13.4   | 24.3       | 18.5 | 6.9         | 0.0      | 3.7       | 6.7       | yes  |
| 9  | Tub    | Reg   | B       | 47.2      | 12.3      | 27.3 | 2.8  | 1.2  | 17.3 | 4.8        | 10.8   | 24.1 | 23.7       | 21.7   | 48.3       | 42.8 | 5.2         | 0.0      | 0.2       | 0.4       | no   |
| 10 | Tub    | Reg   | B       | 35.6      | 9.1       | 26.7 | 2.6  | 1.1  | 17.2 | 4.6        | 7.8    | 23.0 | 22.7       | 17.0   | 50.1       | 44.2 | 5.8         | 0.0      | 0.0       | 0.1       | no   |
| 11 | Tub    | Reg   | B       | 58.9      | 11.4      | 20.2 | 0.4  | 0.3  | 11.8 | 6.8        | 13.6   | 24.2 | 23.8       | 28.8   | 51.1       | 45.2 | 5.6         | 0.0      | 2.5       | 4.5       | yes  |
| 12 | Tub    | Reg   | B       | 38.4      | 9.8       | 26.8 | 2.8  | 1.1  | 16.7 | 4.8        | 8.7    | 23.7 | 23.3       | 18.1   | 49.3       | 43.4 | 5.7         | 0.0      | 0.1       | 0.2       | no   |
| 13 | Tub    | Reg   | B       | 50.0      | 12.3      | 25.7 | 2.3  | 1.0  | 16.6 | 4.7        | 10.8   | 22.5 | 22.2       | 24.7   | 51.6       | 45.5 | 6.0         | 0.0      | 0.1       | 0.1       | no   |
| 14 | Tub    | Reg   | B       | 49.1      | 12.1      | 25.9 | 2.3  | 1.0  | 16.9 | 4.5        | 10.7   | 22.8 | 22.5       | 24.0   | 51.1       | 44.7 | 6.1         | 0.0      | 0.1       | 0.2       | no   |
| 15 | Tub    | Reg   | B       | 76.7      | 14.0      | 19.1 | 2.5  | 1.0  | 12.0 | 2.2        | 41.5   | 56.6 | 55.0       | 17.7   | 24.2       | 17.0 | 6.8         | 0.0      | 0.1       | 0.2       | no   |
| 16 | Tub    | Reg   | B       | 73.6      | 20.8      | 29.6 | 0.1  | 0.6  | 24.7 | 3.4        | 34.5   | 49.1 | 48.1       | 14.7   | 20.9       | 17.3 | 3.2         | 0.0      | 0.2       | 0.3       | no   |
| 17 | Tub    | Reg   | B       | 63.1      | 16.2      | 26.8 | 2.8  | 1.2  | 16.7 | 4.9        | 14.1   | 23.4 | 23.0       | 29.9   | 49.6       | 42.2 | 7.2         | 0.0      | 0.1       | 0.2       | no   |
| 18 | Tub    | Reg   | B       | 77.6      | 14.5      | 19.5 | 2.6  | 1.1  | 12.2 | 2.2        | 41.3   | 55.7 | 54.1       | 18.3   | 24.7       | 17.1 | 7.3         | 0.0      | 0.1       | 0.1       | no   |
| 19 | Tub    | Reg   | B       | 59.8      | 14.4      | 25.2 | 2.1  | 0.9  | 16.5 | 4.5        | 13.7   | 24.0 | 23.6       | 28.9   | 50.6       | 44.6 | 5.7         | 0.0      | 0.1       | 0.2       | no   |
| 20 | Tub    | Reg   | B       | 38.1      | 9.8       | 26.8 | 2.8  | 1.1  | 16.4 | 5.1        | 8.8    | 24.0 | 23.5       | 17.8   | 49.0       | 42.9 | 5.8         | 0.0      | 0.1       | 0.2       | no   |
| 21 | Tub    | Reg   | B       | 56.5      | 13.8      | 25.7 | 2.1  | 1.0  | 17.3 | 4.2        | 11.2   | 20.8 | 20.5       | 28.7   | 53.2       | 46.2 | 6.6         | 0.0      | 0.2       | 0.3       | no   |
| 22 | Tub    | Reg   | B       | 74.9      | 25.7      | 36.2 | 1.5  | 5.1  | 16.8 | 6.8        | 34.8   | 48.9 | 46.4       | 9.1    | 12.8       | 10.9 | 1.6         | 0.0      | 1.6       | 2.2       | no   |
| 23 | Tub    | Reg   | B       | 63.4      | 17.0      | 28.2 | 2.8  | 1.2  | 17.5 | 5.2        | 14.8   | 24.4 | 24.0       | 28.6   | 47.2       | 41.6 | 5.3         | 0.0      | 0.2       | 0.3       | no   |

|    |       |     |    |      |      |      |      |     |      |     |      |      |      |      |      |      |     |     |      |      |     |
|----|-------|-----|----|------|------|------|------|-----|------|-----|------|------|------|------|------|------|-----|-----|------|------|-----|
| 24 | Tub   | Reg | B  | 62.4 | 19.9 | 33.5 | 10.0 | 3.8 | 9.0  | 6.4 | 27.7 | 46.7 | 46.3 | 5.4  | 9.1  | 8.7  | 0.4 | 0.0 | 6.4  | 10.7 | no  |
| 25 | Tub   | Reg | B  | 60.6 | 13.6 | 23.5 | 0.2  | 0.4 | 19.2 | 2.8 | 32.5 | 56.1 | 54.9 | 11.7 | 20.1 | 15.3 | 4.5 | 0.0 | 0.1  | 0.2  | no  |
| 26 | Tub   | Reg | B  | 59.2 | 15.5 | 27.4 | 3.0  | 1.2 | 17.3 | 4.6 | 13.4 | 23.7 | 23.4 | 27.4 | 48.5 | 43.0 | 5.3 | 0.0 | 0.2  | 0.4  | no  |
| 27 | Tub   | Reg | B  | 59.7 | 11.6 | 20.3 | 1.5  | 0.8 | 12.9 | 4.0 | 18.8 | 32.9 | 32.0 | 26.6 | 46.6 | 39.4 | 6.9 | 0.0 | 0.1  | 0.2  | no  |
| 28 | Tub   | Reg | B  | 66.9 | 19.7 | 30.8 | 0.1  | 0.5 | 25.1 | 4.4 | 19.5 | 30.6 | 30.2 | 24.4 | 38.2 | 33.6 | 4.3 | 0.0 | 0.3  | 0.5  | no  |
| 29 | Tub   | Reg | B  | 61.9 | 18.9 | 31.9 | 0.2  | 0.6 | 25.3 | 4.8 | 19.5 | 33.0 | 32.5 | 20.5 | 34.7 | 30.4 | 3.8 | 0.3 | 0.2  | 0.4  | no  |
| 30 | Spray | Reg | B  | 38.2 | 6.3  | 17.2 | 0.1  | 0.1 | 10.6 | 5.3 | 9.2  | 25.2 | 24.8 | 21.0 | 57.4 | 50.3 | 6.8 | 0.0 | 0.1  | 0.2  | no  |
| 31 | Spray | Reg | B  | 43.7 | 6.7  | 16.0 | 0.0  | 0.1 | 10.4 | 4.7 | 10.0 | 24.1 | 23.7 | 24.8 | 59.3 | 52.6 | 6.5 | 0.0 | 0.3  | 0.6  | no  |
| 32 | Stick | Reg | B  | 50.7 | 10.1 | 20.9 | 0.0  | 0.1 | 10.8 | 9.0 | 14.4 | 29.6 | 29.4 | 13.5 | 27.8 | 24.8 | 3.0 | 0.0 | 10.5 | 21.7 | yes |
| 33 | Stick | Reg | B  | 59.0 | 17.3 | 30.7 | 2.1  | 1.1 | 22.0 | 4.1 | 19.1 | 33.9 | 33.2 | 19.9 | 35.2 | 30.2 | 4.8 | 0.0 | 0.1  | 0.2  | no  |
| 34 | Stick | Reg | B  | 88.3 | 32.8 | 38.9 | 0.3  | 0.8 | 33.3 | 3.7 | 36.5 | 43.2 | 42.4 | 14.8 | 17.5 | 14.2 | 3.0 | 0.0 | 0.3  | 0.3  | no  |
| 35 | Stick | Reg | B  | 65.0 | 12.6 | 20.3 | 0.0  | 0.1 | 10.8 | 8.5 | 18.0 | 28.9 | 28.6 | 19.8 | 31.9 | 28.0 | 3.6 | 0.0 | 11.7 | 18.9 | yes |
| 36 | Stick | Reg | B  | 83.4 | 24.3 | 30.5 | 2.1  | 1.1 | 22.2 | 4.0 | 27.1 | 34.1 | 33.4 | 28.1 | 35.2 | 30.1 | 4.9 | 0.0 | 0.1  | 0.2  | no  |
| 37 | Stick | Reg | B  | 53.6 | 16.9 | 33.0 | 2.1  | 1.1 | 23.9 | 4.6 | 13.6 | 26.5 | 26.0 | 20.7 | 40.4 | 35.6 | 4.6 | 0.0 | 0.1  | 0.2  | no  |
| 38 | Tub   | Reg | PL | 52.7 | 14.8 | 29.4 | 3.2  | 1.4 | 19.3 | 4.3 | 10.3 | 20.4 | 20.1 | 25.2 | 50.0 | 43.9 | 5.9 | 0.0 | 0.1  | 0.3  | no  |
| 39 | Tub   | Reg | PL | 47.3 | 8.5  | 18.8 | 0.0  | 0.1 | 10.8 | 6.8 | 11.5 | 25.4 | 25.0 | 22.4 | 49.4 | 43.8 | 5.4 | 0.0 | 2.9  | 6.5  | yes |
| 40 | Tub   | Reg | PL | 60.1 | 13.8 | 24.0 | 0.4  | 1.1 | 17.7 | 3.1 | 31.1 | 54.1 | 52.6 | 12.3 | 21.4 | 15.7 | 5.3 | 0.0 | 0.3  | 0.5  | no  |
| 41 | Tub   | Reg | PL | 81.9 | 14.8 | 18.9 | 0.0  | 0.1 | 10.5 | 7.4 | 22.1 | 28.2 | 27.8 | 31.6 | 40.3 | 35.5 | 4.6 | 0.0 | 9.9  | 12.6 | yes |
| 42 | Tub   | Reg | PL | 48.7 | 8.6  | 18.4 | 0.0  | 0.1 | 10.8 | 6.7 | 11.7 | 25.1 | 24.8 | 23.3 | 50.1 | 44.2 | 5.6 | 0.0 | 3.0  | 6.4  | yes |
| 43 | Tub   | Reg | PL | 60.9 | 15.7 | 27.0 | 2.5  | 1.2 | 16.8 | 5.2 | 13.3 | 22.9 | 22.5 | 28.6 | 49.2 | 43.5 | 5.3 | 0.0 | 0.6  | 1.0  | no  |
| 44 | Stick | Reg | PL | 76.2 | 15.1 | 20.7 | 0.0  | 0.1 | 10.9 | 8.8 | 20.5 | 28.1 | 27.9 | 22.6 | 31.0 | 27.2 | 3.6 | 0.0 | 14.7 | 20.2 | yes |
| 45 | Stick | Reg | PL | 51.9 | 10.3 | 20.7 | 0.0  | 0.1 | 11.0 | 8.7 | 14.3 | 28.9 | 28.6 | 15.3 | 30.9 | 27.4 | 3.3 | 0.0 | 9.7  | 19.6 | yes |
| 46 | Stick | Reg | PL | 72.8 | 14.4 | 20.7 | 0.0  | 0.1 | 10.6 | 9.0 | 19.8 | 28.4 | 28.2 | 19.5 | 28.0 | 24.7 | 3.2 | 0.0 | 15.9 | 22.8 | yes |

Notes: SFA, saturated fatty acids; MUFA, monounsaturated fatty acids; PUFA, polyunsaturated fatty acids; TFA, trans fatty acids; PHVO, partially hydrogenated vegetable oils; LA, linoleic acid; ALA, alpha-linolenic acid; EPA/DHA, eicosapentaenoic acid and docosahexaenoic acid; B, Branded; PL, Private Label; Reg, Regular.

\* The analysis of fatty acids was done by gas chromatography. PHVO was assessed from the food label using the ingredient list and the Nutrition Facts label. Data are expressed in grams per 14 g serving size.

**Table S2. Total Fat and fatty acid composition of spreads and margarines in the US market in 2011, expressed in g per 100g edible food and % of total fatty acids\***

|    | Format | Type  | Branded | Total fat | Total SFA |      | Total MUFA |      | Total PUFA |      | C18:2 (LA) | C18:3 (ALA) | EPA/DHA | Total TFA |      |
|----|--------|-------|---------|-----------|-----------|------|------------|------|------------|------|------------|-------------|---------|-----------|------|
|    |        |       |         | g/100g    | g/100g    | % FA | g/100g     | % FA | g/100g     | % FA | % FA       | % FA        | % FA    | g/100g    | % FA |
| 1  | Tub    | Light | B       | 32.7      | 5.9       | 19.0 | 7.3        | 23.2 | 16.2       | 51.7 | 45.2       | 6.5         | 0.0     | 1.9       | 6.0  |
| 2  | Tub    | Light | B       | 43.1      | 11.2      | 27.3 | 8.7        | 21.2 | 21.0       | 51.0 | 44.3       | 6.6         | 0.0     | 0.2       | 0.5  |
| 3  | Tub    | Light | B       | 58.7      | 11.0      | 19.6 | 13.1       | 23.3 | 28.9       | 51.6 | 44.0       | 7.4         | 0.0     | 3.1       | 5.6  |
| 4  | Tub    | Light | B       | 42.6      | 8.0       | 19.6 | 9.4        | 23.1 | 20.9       | 51.4 | 44.6       | 6.7         | 0.0     | 2.4       | 5.9  |
| 5  | Tub    | Light | B       | 38.7      | 10.5      | 28.6 | 7.9        | 21.4 | 18.3       | 49.6 | 43.1       | 6.5         | 0.0     | 0.2       | 0.5  |
| 6  | Tub    | Light | B       | 42.1      | 13.0      | 32.4 | 12.4       | 30.7 | 14.6       | 36.4 | 31.3       | 5.0         | 0.0     | 0.2       | 0.5  |
| 7  | Tub    | Reg   | B       | 48.1      | 8.7       | 19.0 | 10.7       | 23.3 | 23.6       | 51.4 | 44.9       | 6.4         | 0.0     | 2.9       | 6.3  |
| 8  | Tub    | Reg   | B       | 35.9      | 9.5       | 27.8 | 7.4        | 21.6 | 17.2       | 50.2 | 43.5       | 6.6         | 0.0     | 0.2       | 0.5  |
| 9  | Tub    | Reg   | B       | 41.8      | 10.7      | 26.7 | 8.9        | 22.3 | 20.2       | 50.5 | 45.2       | 6.0         | 0.0     | 0.2       | 0.5  |
| 10 | Tub    | Reg   | B       | 52.9      | 13.3      | 26.4 | 10.6       | 21.0 | 26.3       | 52.1 | 45.4       | 6.7         | 0.0     | 0.3       | 0.6  |
| 11 | Tub    | Reg   | B       | 52.8      | 13.3      | 26.5 | 10.5       | 20.8 | 26.2       | 52.1 | 45.7       | 6.7         | 0.0     | 0.3       | 0.6  |
| 12 | Tub    | Reg   | B       | 69.5      | 17.9      | 26.9 | 17.8       | 26.8 | 30.2       | 45.5 | 39.7       | 5.8         | 0.0     | 0.5       | 0.7  |
| 13 | Tub    | Reg   | B       | 57.1      | 14.7      | 26.9 | 12.7       | 23.2 | 26.9       | 49.4 | 42.9       | 6.5         | 0.0     | 0.3       | 0.5  |
| 14 | Tub    | Reg   | B       | 59.0      | 15.2      | 26.9 | 11.9       | 21.1 | 29.1       | 51.5 | 44.6       | 6.8         | 0.0     | 0.3       | 0.5  |
| 15 | Tub    | Reg   | B       | 38.9      | 10.0      | 27.1 | 7.8        | 21.1 | 19.0       | 51.2 | 44.5       | 6.7         | 0.0     | 0.2       | 0.6  |
| 16 | Tub    | Reg   | B       | 55.0      | 13.0      | 24.6 | 11.1       | 21.2 | 25.2       | 48.0 | 42.0       | 6.0         | 0.0     | 3.3       | 6.2  |
| 17 | Tub    | Reg   | B       | 64.4      | 12.0      | 19.5 | 14.0       | 22.7 | 31.8       | 51.6 | 45.1       | 6.4         | 0.0     | 3.8       | 6.2  |
| 18 | Tub    | Reg   | B       | 59.0      | 11.4      | 20.2 | 29.3       | 52.1 | 14.8       | 26.2 | 21.1       | 5.1         | 0.0     | 0.9       | 1.5  |
| 19 | Tub    | Reg   | B       | 57.7      | 10.5      | 19.0 | 12.7       | 23.0 | 28.4       | 51.4 | 45.0       | 6.3         | 0.0     | 3.6       | 6.5  |
| 20 | Tub    | Reg   | B       | 60.3      | 11.9      | 20.6 | 17.8       | 31.0 | 27.6       | 47.9 | 40.2       | 7.6         | 0.0     | 0.3       | 0.5  |
| 21 | Tub    | Reg   | B       | 66.2      | 20.1      | 31.7 | 19.6       | 31.1 | 23.2       | 36.7 | 31.6       | 4.5         | 0.4     | 0.3       | 0.5  |
| 22 | Tub    | Reg   | B       | 63.6      | 19.4      | 31.9 | 18.9       | 31.1 | 22.2       | 36.6 | 32.2       | 4.3         | 0.0     | 0.3       | 0.5  |
| 23 | Spray  | Reg   | B       | 42.4      | 7.0       | 17.4 | 8.7        | 21.5 | 24.5       | 60.6 | 52.3       | 8.1         | 0.0     | 0.2       | 0.5  |
| 24 | Spray  | Reg   | B       | 62.5      | 10.5      | 17.6 | 13.6       | 22.7 | 35.0       | 58.6 | 51.3       | 7.2         | 0.0     | 0.7       | 1.2  |
| 25 | Stick  | Light | B       | 39.7      | 7.7       | 20.4 | 9.1        | 23.9 | 12.3       | 32.5 | 28.5       | 4.0         | 0.0     | 8.8       | 23.2 |
| 26 | Stick  | Reg   | B       | 55.2      | 10.9      | 20.6 | 12.3       | 23.3 | 17.3       | 32.7 | 28.5       | 4.1         | 0.0     | 12.3      | 23.3 |
| 27 | Stick  | Reg   | B       | 60.3      | 11.5      | 20.0 | 15.3       | 26.5 | 18.5       | 32.1 | 28.6       | 4.0         | 0.0     | 12.3      | 21.4 |
| 28 | Stick  | Reg   | B       | 65.6      | 13.0      | 20.7 | 14.9       | 23.7 | 20.3       | 32.4 | 28.2       | 4.0         | 0.0     | 14.6      | 23.2 |
| 29 | Stick  | Reg   | B       | 78.9      | 22.7      | 30.0 | 19.6       | 26.0 | 30.2       | 40.1 | 34.0       | 6.0         | 0.0     | 2.9       | 3.8  |
| 30 | Stick  | Reg   | B       | 55.4      | 10.5      | 19.8 | 14.5       | 27.4 | 16.3       | 30.9 | 27.4       | 3.9         | 0.0     | 11.6      | 21.9 |
| 31 | Stick  | Reg   | B       | 84.3      | 16.5      | 20.5 | 19.1       | 23.7 | 26.2       | 32.6 | 28.5       | 4.0         | 0.0     | 18.7      | 23.2 |
| 32 | Stick  | Reg   | B       | 74.7      | 37.5      | 52.9 | 22.4       | 31.6 | 9.1        | 12.8 | 10.6       | 1.6         | 0.3     | 1.9       | 2.7  |

|    |     |       |    |      |      |      |      |      |      |      |      |     |     |     |      |
|----|-----|-------|----|------|------|------|------|------|------|------|------|-----|-----|-----|------|
| 33 | Tub | Light | PL | 50.5 | 9.1  | 18.8 | 11.2 | 23.1 | 24.5 | 50.8 | 44.2 | 6.5 | 0.0 | 3.5 | 7.3  |
| 34 | Tub | Reg   | PL | 68.5 | 12.8 | 19.6 | 15.0 | 22.9 | 30.2 | 46.0 | 39.9 | 6.1 | 0.0 | 7.5 | 11.5 |
| 35 | Tub | Reg   | PL | 51.8 | 9.3  | 18.7 | 11.3 | 22.8 | 26.0 | 52.5 | 45.7 | 6.7 | 0.0 | 3.0 | 6.1  |
| 36 | Tub | Reg   | PL | 58.4 | 18.3 | 32.8 | 21.5 | 38.6 | 15.3 | 27.5 | 22.9 | 4.5 | 0.0 | 0.6 | 1.1  |
| 37 | Tub | Reg   | PL | 82.7 | 15.1 | 19.1 | 18.3 | 23.2 | 35.6 | 45.1 | 39.2 | 5.8 | 0.0 | 9.9 | 12.6 |
| 38 | Tub | Reg   | PL | 40.3 | 7.5  | 19.6 | 8.8  | 22.9 | 19.0 | 49.3 | 42.7 | 6.5 | 0.0 | 3.2 | 8.2  |
| 39 | Tub | Reg   | PL | 68.8 | 13.1 | 19.9 | 14.9 | 22.7 | 32.5 | 49.4 | 42.8 | 6.5 | 0.0 | 5.3 | 8.1  |
| 40 | Tub | Reg   | PL | 41.1 | 7.9  | 20.1 | 9.0  | 22.8 | 19.8 | 50.3 | 43.5 | 6.7 | 0.0 | 2.7 | 6.8  |
| 41 | Tub | Reg   | PL | 47.4 | 9.0  | 20.0 | 10.1 | 22.3 | 23.4 | 51.8 | 44.7 | 7.0 | 0.0 | 2.7 | 6.0  |
| 42 | Tub | Reg   | PL | 39.6 | 7.7  | 20.2 | 8.8  | 23.3 | 18.7 | 49.4 | 42.9 | 6.5 | 0.0 | 2.7 | 7.0  |
| 43 | Tub | Reg   | PL | 49.9 | 9.0  | 18.8 | 10.9 | 23.0 | 24.3 | 50.9 | 44.4 | 6.5 | 0.0 | 3.5 | 7.3  |
| 44 | Tub | Reg   | PL | 52.5 | 9.7  | 19.3 | 11.6 | 23.0 | 25.8 | 51.5 | 44.8 | 6.7 | 0.0 | 3.1 | 6.2  |

Notes: SFA, saturated fatty acids; MUFA, monounsaturated fatty acids; PUFA, polyunsaturated fatty acids; TFA, trans fatty acids; PHVO, partially hydrogenated vegetable oils; LA, linoleic acid; ALA, alpha-linolenic acid; B, Branded; PL, Private Label; Reg, Regular.

\* The analysis of fatty acids was done by gas chromatography. PHVO was assessed from the food label using the ingredient list and the Nutrition Facts label. Data are expressed in grams per 14 g serving size and in percentage of total fatty acids.

**Table S3: USDA-FNDDS Reference Data on the fatty acid composition of margarines and spreads**

| Type         | Format | Total fat | g/serving |          |          |     | % FA |          |          |      | WIFYE code (1) | USDA code (2) |
|--------------|--------|-----------|-----------|----------|----------|-----|------|----------|----------|------|----------------|---------------|
|              |        |           | SFA       | cis-MUFA | cis-PUFA | TFA | SFA  | cis-MUFA | cis-PUFA | TFA  |                |               |
| Margarine    | stick  | 11.3      | 2.1       | 3.5      | 3.3      | 2.1 | 19.4 | 31.5     | 30.1     | 19.0 | 81102010       | 04610         |
|              | tub    | 11.2      | 2.0       | 4.4      | 3.7      | 0.8 | 18.4 | 40.3     | 33.8     | 7.5  | 81102020       | 04611         |
| Spread       | stick  | 8.5       | 1.5       | 2.5      | 2.2      | 1.8 | 19.0 | 31.0     | 27.8     | 22.2 | 81103040       | 04612         |
|              | tub    | 8.4       | 1.7       | 2.2      | 3.7      | 0.5 | 20.9 | 27.6     | 45.2     | 6.3  | 81103080       | 04613         |
| Light spread | tub    | 5.3       | 1.2       | 1.8      | 1.7      | 0.2 | 24.7 | 36.5     | 35.6     | 3.2  | 81104010       | 04128         |

Notes: USDA, U.S. Department of Agriculture; FNDDS, Food and Nutrient Database for Dietary Studies; WIFYE, what's in the foods you eat; % FA, % of total fatty acids; SFA, saturated fatty acids; cis-MUFA, cis-monounsaturated fatty acids; cis-PUFA, cis-polyunsaturated fatty acids; TFA, trans fatty acids.

Data are expressed in grams per 14 g serving size and in percentage of total fatty acids.

1. U.S. Department of Agriculture, Agricultural Research Service. 2014. USDA Food and Nutrient Database for Dietary Studies 2011-2012. Food Surveys Research Group Home Page, <http://www.ars.usda.gov/ba/bhnrc/fsrg>.
2. U.S. Department of Agriculture, Agricultural Research Service. 2014. USDA National Nutrient Database for Standard Reference, Release 28. Nutrient Data Laboratory Home Page, <http://www.ars.usda.gov/nutrientdata>
